RESEARCH ARTICLE

# Hepatocyte-Specific *Arid1a* Deficiency Initiates Mouse Steatohepatitis and Hepatocellular Carcinoma

Jia-Zhu Fang<sup>1,2,3</sup>✉, Chong Li<sup>4</sup>✉, Xiao-Yan Liu<sup>1,2</sup>, Tao-Tao Hu<sup>1,2,3</sup>, Zu-Sen Fan<sup>4\*</sup>, Ze-Guang Han<sup>1,2,3\*</sup>

**1** Key Laboratory of Systems Biomedicine (Ministry of Education) and Collaborative Innovation Center of Systems Biomedicine of Rui-Jin Hospital, Shanghai Jiao Tong University School of Medicine, Shanghai, China, **2** Shanghai-MOST Key Laboratory for Disease and Health Genomics, Chinese National Human Genome Center at Shanghai, Shanghai, China, **3** Shanghai Center for Systems Biomedicine, Shanghai Jiao Tong University, Shanghai, China, **4** Chinese Academy of Sciences Key Laboratory of Infection and Immunity, Institute of Biophysics, Chinese Academy of Sciences, Beijing, China

✉ These authors contributed equally to this work.

\* [hanzg@sjtu.edu.cn](mailto:hanzg@sjtu.edu.cn) (Z-GH); [fanzg@moon.ibp.ac.cn](mailto:fanzg@moon.ibp.ac.cn) (Z-SF)

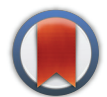

CrossMark  
click for updates

OPEN ACCESS

**Citation:** Fang J-Z, Li C, Liu X-Y, Hu T-T, Fan Z-S, Han Z-G (2015) Hepatocyte-Specific *Arid1a* Deficiency Initiates Mouse Steatohepatitis and Hepatocellular Carcinoma. PLoS ONE 10(11): e0143042. doi:10.1371/journal.pone.0143042

**Editor:** Diego Calvisi, University of Medicine, Greifswald, GERMANY

**Received:** August 30, 2015

**Accepted:** October 29, 2015

**Published:** November 16, 2015

**Copyright:** © 2015 Fang et al. This is an open access article distributed under the terms of the [Creative Commons Attribution License](https://creativecommons.org/licenses/by/4.0/), which permits unrestricted use, distribution, and reproduction in any medium, provided the original author and source are credited.

**Data Availability Statement:** All relevant data are within the paper and its Supporting Information files.

**Funding:** This work was supported by grants from the National Natural Science Foundation of China (81472621, 81272271 and 81201690), the China National Key Projects for Infectious Disease (2012ZX10002012-008 and 2013ZX10002010-006), and Chinese National Key Program on Basic Research (2010CB529200 and 2012CB722308).

**Competing Interests:** The authors have declared that no competing interests exist.

## Abstract

*ARID1A*, encoding a subunit of chromatin remodeling SWI/SNF complexes, has recently been considered as a new type of tumor suppressor gene for its somatic mutations frequently found in various human tumors, including hepatocellular carcinoma (HCC). However, the role and mechanism of inactivated *ARID1A* mutations in tumorigenesis remain unclear. To investigate the role of *ARID1A* inactivation in HCC pathogenesis, we generated hepatocyte-specific *Arid1a* knockout (*Arid1a*<sup>LKO</sup>) mice by crossing mice carrying loxP-flanked *Arid1a* exon 8 alleles (*Arid1a*<sup>fl/fl</sup>) with albumin promoter-Cre transgenic mice. Significantly, the hepatocyte-specific *Arid1a* deficiency results in mouse steatohepatitis and HCC development. In *Arid1a*<sup>LKO</sup> mice, we found that innate immune cells, including F4/80+ macrophages and CD11c+ neutrophil cells, infiltrate into the liver parenchyma, accompanied by the increased tumor necrosis factor (TNF)-α and interleukin (IL)-6, and activation of STAT3 and NF-κB pathways. In conclusion, hepatocyte-specific *Arid1a* deficiency could lead to mouse steatohepatitis and HCC development. This study provides an alternative mechanism by which *Arid1a* deficiency contributes to HCC tumorigenesis.

## Introduction

*ARID1A*, also known as BAF250a, is a subunit of the SWI/SNF complex. *ARID1A* mutations, including missense, nonsense and frame shift mutations led by small insertion and deletion, have frequently been detected in a series of human tumors, including ovarian clear-cell carcinoma [1, 2], gastric cancer [3, 4], breast cancer [3, 5, 6], pancreatic cancer [3, 7, 8], cholangiocarcinoma [9, 10], clear cell renal cell carcinoma [11], esophageal adenocarcinoma [12], neuroblastoma [13], diffuse large B-cell lymphoma [14] and transitional cell carcinoma of the

bladder [15]. Patients with *ARID1A* mutations may constitute a specific subtype of certain tumors. For example, *ARID1A* mutations were frequently identified in gastric cancers with microsatellite instability and Epstein-Barr virus infection [16]. In addition to somatic mutations, *ARID1A* loss has also been found in a variety of human tumor types, such as uterine endometrioid carcinomas, uterine clear-cell carcinomas, uterine serous carcinomas, uterine carcinosarcomas, clear cell renal cell carcinoma, prostate cancers and medulloblastomas [3]. Recently, several groups, including ours, detected *ARID1A* mutations in 10–15% of hepatocellular carcinoma (HCC) [17–20]. *ARID1A* has recently been suggested to be a new type of tumor suppressor gene in many tumors; however, the role of and mechanism underlying *ARID1A* mutation or loss in HCC tumorigenesis remain unclear.

Previous *in vitro* experiments supported the idea that *ARID1A*/BAF250a exerts a tumor suppressive effect. *ARID1A* knockdown promotes cell cycle progression, cell proliferation, tumorigenicity, migration, invasion and metastasis [4, 21–23], whereas *ARID1A* overexpression inhibits cell proliferation and tumor growth [4, 21]. *In vivo* study also shows that *ARID1A* deficiency could promote tumor formation in ovary cancer [24, 25]. However, *in vivo* evidence that *ARID1A* functions as a tumor suppressor in HCC has not yet been provided. Previous studies using genetically engineered *Arid1a*-deficient mice demonstrated that *Arid1a* is required for animal development. Deletion of *Arid1a* leads to developmental arrest and the absence of the mesodermal layer [26]. Conditional *Arid1a* ablation in mice hearts results in trabeculation defects and embryonic lethality [27]. Here, we established hepatocyte-specific *Arid1a*-deficient mice and found that these mice spontaneously developed steatohepatitis and HCC. To our knowledge, we have developed the first murine *Arid1a* deficiency-induced HCC model.

## Materials and Methods

### Mice

LoxP-flanked (floxed [f]) *Arid1a* (*Arid1a<sup>ff</sup>*) mice were kindly provided by Zhong Wang at the Cardiovascular Research Center, Massachusetts General Hospital, Harvard Medical School. *Arid1a<sup>ff</sup>* mice and albumin promoter (Alb)-Cre (from the Jackson Laboratory) were crossed to generate conditional tissue-specific *Arid1a*-KO mice designated as *Arid1a<sup>LKO</sup>*. In all of the animal experiments, *Arid1a<sup>ff</sup>* littermates lacking Cre recombinase were used as controls. All animals received care according to the ethical guidelines of Shanghai Bimodel Organism Science & Technology Development Co. Ltd., and all animal procedures were conducted in compliance with institutional guidelines and protocols. This project was approved by the ethics committee of the Chinese National Human Genome Center at Shanghai (IACUC no. 2012–0026).

### Genotyping

Mice genotyping were described as before [26]. In brief, mice liver DNA or HCC DNA-harvested by LCM (Laser capture microdissection) were prepared with Tiagen Tissue Genome DNA Extraction Kit (Tiagen, Beijing, China). DNA was diluted to 100 ng/μl. 1 μl DNA was employed as the templates in a 20 μl system. Primers were listed in Table 1. The PCR products were electrophoresis in 1% agarose gel for 20 min, and recorded by Gel imaging analysis system. For *Arid1a* gene, the 812-bp band indicates *Arid1a<sup>ff</sup>* while the 268-bp band indicates *Arid1a<sup>LKO</sup>*. The PCR product of *Cre* is the 300-bp band.

### Diethyl nitrosamine (DEN)-induced hepatocarcinogenesis murine model

Two week-old male *Arid1a<sup>ff</sup>* and *Arid1a<sup>LKO</sup>* mice were injected with DEN (25 mg/kg of body weight) intraperitoneally (*i.p.*). Mice were subsequently sacrificed at 4 or 9 months and tumor

**Table 1. Primers for genotyping.**

| Genes                        | Sequence (5'-3')         |
|------------------------------|--------------------------|
| <i>Arid1a-F</i> <sup>#</sup> | GTAATGGGAAAGCGACTACTGGAG |
| <i>Arid1a-R</i> <sup>§</sup> | TGTTTCATTTTTGTGGCGGGAG   |
| <i>cre-F</i>                 | GTAATGGGAAAGCGACTACTGGAG |
| <i>cre-R</i>                 | TGTTTCATTTTTGTGGCGGGAG   |

<sup>#</sup>F, Forward;

<sup>§</sup>R, Reverse.

doi:10.1371/journal.pone.0143042.t001

nodules on the liver surface were calculated. The livers of these mice were also routinely formalin-fixed and paraffin-embedded for further analysis. The body and liver weights were analyzed and their peripheral blood sera were harvested.

### LPS induced acute liver injury

Acute liver injury was induced as described before [28]. In brief, after injection of LPS (25 µg/kg; From Escherichia coli 0111:B4, Sigma-Aldrich, Germany) *i.p.*, the mice body temperature (BT) were observed carefully by infrared thermometer at 12h, 24h, 48h and 72h. The BT < 23.4°C as humane endpoint was implemented [29]. The bloods were collected for aminotransferases (ALT) analysis and right liver lobe was fixed for pathologic analysis. Remaining parts of liver were stored at -80°C.

### Histochemistry and immunohistochemical (IHC) staining

Hematoxylin and eosin (H&E) and Sirius red collagen staining were performed using a standard protocol for paraffin sections. Cryosections were used for Oil red O staining according to a standard protocol. IHC staining was performed on paraffin sections using a rabbit polyclonal antibody that had been raised against Ki-67, PCNA, F4/80 (Cell Signaling Technology). Primary antibodies were incubated at 4°C overnight. The staining was visualized using EnVision™ Detection Systems (Dako Corp.).

### Laser capture microdissection

Tumor tissues were embedded in OCT (Sakura, Hayward CA). Three 10 µm-thick cryosections were prepared and air dried. PixCell Iie system (Arcturus Engineering, Mountain View CA) were employed to perform LCM according to the manufactures protocol [30, 31].

### Scoring system definition for pathological examination

The steatohepatitis was evaluated by a standard criteria scoring system as described before [32, 33]. In brief, steatosis area percent: 0 (0–5%), 1 (5%–33%), 2 (33%–66%) and 3 (> 66%). Ballooning degeneration distribution: 0 (absence), 1 (scattered) and 2 (panacinar). Lobular inflammation: 0 (absence), 1 (1–2 foci), 2 (2–4 foci) and 3 (>4 foci) at 200 field. Portal inflammation was graded as 0 (none), 1 (mild or few), 2 (moderate) and 3 (marked or many). All sections were evaluated blindly by two pathologists.

### Nonparenchymal liver cells (NPC)

NPCs were prepared as previously described [34]. In brief, the livers were perfused with 1 × Hanks', then passed through a 80 µm mesh in RPMI 1640 medium (2% FBS, Invitrogen).

Collected liver cell suspensions were centrifuged (2 minutes, 48g). Transfer the supernatant to a fresh tube and centrifuge (10 minutes, 440g). The pellet were resuspended with 40% Percoll<sup>®</sup>, and mounted on 80% Percoll<sup>®</sup>. NPCs were at the interface after gradient centrifuge (15 minutes, 780g).

### Flow cytometric analysis

FACSCalibur flow cytometer (BD Biosciences) was employed for flow cytometry. Firstly, NPCs' Fcγ III/II receptor were blocked by anti-CD16/CD32 antibodies. Then, incubated with anti-CD11c, anti-CD3, anti-CD19 and anti-F4/80 antibodies (eBiosciences), respectively. The data was analyzed with CELLQuest software (BD Biosciences).

### Quantitative real-time RT-PCR

Total RNAs of mouse livers were extracted using TRIzol<sup>®</sup> (Invitrogen). cDNA was reverse transcribed with the SuperScript First-Strand Synthesis System (Invitrogen). Real-time PCR was performed in 20μl volume containing SYBR Green Reagent (TaKaRa) and specific primers (Table 2) on a qPCR machine (TaKaRa). The reactions were in triplicate. All of the results were normalized to GAPDH mRNA levels.

### Liver function test

ALT, AST, TCHO, HDL-C and LDL-C were measured using standard procedures, as previously described [35].

### Immunoblot analyses

Protein lysates from mouse livers were separated using SDS-PAGE, and transferred to nitrocellulose membranes. Antibodies against ARID1A/BAF250a, IκBα, β-actin (Santa Cruz), phospho-IκBα, STAT3, phospho-STAT3 (Cell Signaling Technology) were used as the first antibodies. Anti-rabbit-800 or anti-mouse-800 secondary antibodies were used accordingly (Santa Cruz). Fluorescent intensity indicating protein expression levels were captured by Odyssey (LI-COR<sup>®</sup> bioscience).

### Statistics

Statistical significance among groups was analyzed using either an unpaired two-sample Student's *t*-test, one-way or two-way ANOVA. The *P* values for multiple comparisons were adjusted by Bonferroni correction method. We defined the statistical significance as a *P* value less than 0.05.

## Results

### Hepatocyte-specific *Arid1a* deficiency leads to mouse steatohepatitis and HCC

Like most human cancers, nonsense and frame shift mutations throughout *ARID1A* gene have frequently been found in HCC [18, 19, 22], indicating that these *ARID1A* mutations could inactivate *ARID1A* function in HCC. Base on this, we constructed conditional hepatocyte-specific *Arid1a* knockout (KO) (*Arid1a*<sup>LKO</sup>) mice to explore its roles in HCC development by crossing mice carrying loxP-flanked *Arid1a* exon 8 alleles (*Arid1a*<sup>fl/fl</sup>) with Alb-Cre transgenic mice, resulting in efficient Cre-mediated recombination in hepatocytes (S1A Fig). *Arid1a*<sup>LKO</sup>

**Table 2. Primers for cytokines and chemokines.**

| <b>Genes</b>     | <b>Sequence (5'-3')</b>      |
|------------------|------------------------------|
| <i>mIL-6-F</i>   | AGATAACAAGAAAGACAAAGCCAGAGTC |
| <i>mIL-6-R</i>   | GCATTGGAAATTGGGGTAGGAAG      |
| <i>mTNF-F</i>    | GAGTGACAAGCCTGTAGCCC         |
| <i>mTNF-R</i>    | GGAGGTTGACTTCTCTCTGGTAT      |
| <i>mIFN-γ-F</i>  | ACACTGCATCTTGGCTTTGCAGCT     |
| <i>mIFN-γ-R</i>  | TGAGCTCATTGAATGCTTGGCGCT     |
| <i>mCCL1-F</i>   | GGCTGCCGTGTGGATACAG          |
| <i>mCCL1-R</i>   | AGGTGATTTTGAACCCACGTTT       |
| <i>mCCL11-F</i>  | GAATCACCAACAACAGATGCAC       |
| <i>mCCL11-R</i>  | ATCCTGGACCCACTTCTTCTT        |
| <i>mCCL12-F</i>  | ATTTCACACTTCTATGCCTCCT       |
| <i>mCCL12-R</i>  | ATCCAGTATGGTCCTGAAGATCA      |
| <i>mCCL17-F</i>  | TACCATGAGGTCACCTCAGATGC      |
| <i>mCCL17-R</i>  | GCACTCTCGGCCTACATTGG         |
| <i>mCCL19-F</i>  | GGGGTGCTAATGATGCGGAA         |
| <i>mCCL19-R</i>  | CCTTAGTGTGGTGAACACAACA       |
| <i>mCCL2-F</i>   | ATTCTGTGACCATCCCCTCAT        |
| <i>mCCL2-R</i>   | TGTATGTGCCTCTGAACCCAC        |
| <i>mCCL20-F</i>  | GCCTCTCGTACATACAGACGC        |
| <i>mCCL20-R</i>  | CCAGTTCTGCTTTGGATCAGC        |
| <i>mCCL4-F</i>   | TTCTGTCTGTTTCTCTTACACCT      |
| <i>mCCL4-R</i>   | CTGTCTGCCTCTTTTGGTCAG        |
| <i>mCCL5-F</i>   | GCTGCTTTGCCTACCTCTCC         |
| <i>mCCL5-R</i>   | TCGAGTGACAAACACGACTGC        |
| <i>mCCL6-F</i>   | GCTGGCCTCATACAAGAAATGG       |
| <i>mCCL6-R</i>   | GCTTAGGCACCTCTGAACTCTC       |
| <i>mCCL7-F</i>   | GCTGCTTTCAGCATCCAAGTG        |
| <i>mCCL7-R</i>   | CCAGGGACACCGACTACTG          |
| <i>mCCL8-F</i>   | TCTACGCAGTGCTTCTTTGCC        |
| <i>mCCL8-R</i>   | AAGGGGATCTTCAGCTTTAGTA       |
| <i>mCCL9-F</i>   | CCCTCTCCTTCTCATTCTTACA       |
| <i>mCCL9-R</i>   | AGTCTTGAAAGCCCATGTGAAA       |
| <i>mCXCL11-F</i> | GGCTTCTCTATGTTCAAACAGGG      |
| <i>mCXCL11-R</i> | GCCGTTACTCGGGTAAATTACA       |
| <i>mCXCL13-F</i> | GGCCACGGTATCTGGAAGC          |
| <i>mCXCL13-R</i> | GGCGTAACTTGAATCCGATCTA       |
| <i>mCXCL10-F</i> | CCAAGTGCTGCCGTCATTTTC        |
| <i>mCXCL10-R</i> | GGCTCGCAGGGATGATTTCAA        |
| <i>mCXCL12-F</i> | TGCATCAGTGACGGTAAACCA        |
| <i>mCXCL12-R</i> | TTCTTCAGCCGTGCAACAATC        |
| <i>mCXCL2-F</i>  | CCAACCACAGGCTACAGG           |
| <i>mCXCL2-R</i>  | GCGTCACACTCAAGCTCTG          |
| <i>mCXCL5-F</i>  | TGCCCTACGGTGAAGTCATA         |
| <i>mCXCL5-R</i>  | TGCATTCGGCTTAGCTTTCTTT       |
| <i>mCXCL9-F</i>  | GGAGTTGAGGAAACCCCTAGTG       |
| <i>mCXCL9-R</i>  | GGGATTTGTAGTGGATCGTGC        |
| <i>mPROM1-F</i>  | CCTTGTGGTTCTTACGTTTGTG       |

(Continued)

Table 2. (Continued)

| Genes           | Sequence (5'-3')       |
|-----------------|------------------------|
| <i>mPROM1-R</i> | CGTTGACGACATTCTCAAGCTG |
| <i>mDLK1-F</i>  | CCCAGGTGAGCTTCGAGTG    |
| <i>mDLK1-R</i>  | GGAGAGGGGTACTCTTGTGAG  |
| <i>mAFP-F</i>   | CTTCCCTCATCTCTCTGCTAC  |
| <i>mAFP-R</i>   | ACAAACTGGGTAAAGGTGATGG |
| <i>mGAPDH-F</i> | TGTGTCCGTCGTGGATCTGA   |
| <i>mGAPDH-R</i> | CCTGCTTACCACCTTCTTGA   |

doi:10.1371/journal.pone.0143042.t002

mice born viable and fertile at the expected Mendelian frequencies. Postnatal *Arid1a*<sup>LKO</sup> mice demonstrated efficient hepatic ablation of Arid1a/BAF250a (S1B Fig).

We examined the livers and serum indices of hepatic functions in *Arid1a*<sup>LKO</sup> mice at different ages. We found that infiltrating inflammatory cells and lipid accumulation, as revealed by oil red O staining, gradually increased in these mouse livers in an age-dependent manner (Fig 1A and 1B). Peripheral serum indices revealed that ALT, AST and TCHO were significantly increased in postnatal mice in an age-dependent manner (Fig 1C). Moreover, serum LDL-C, but not HDL-C, levels were also increased in *Arid1a*<sup>LKO</sup> mice (S1C Fig). These data indicate that steatohepatitis occurs in *Arid1a*<sup>LKO</sup> mice (Table 3). In addition, collagen deposition in the livers of 2 month old mice (Fig 1D), as indicated by Sirius red collagen staining, was also increased, suggesting that liver fibrogenesis occurred secondary to steatohepatitis.

Interestingly, *Arid1a*<sup>LKO</sup> hepatocytes displayed characteristic features of large-cell dysplasia with strong anisokaryosis (S1D Fig), which was associated with an increased risk of HCC development [36, 37]. About forty percent of these 10–18 month old male *Arid1a*<sup>LKO</sup> mice developed macroscopically visible liver tumors (Fig 2A and 2B and Table 3), whereas no liver tumors were found in *Arid1a*<sup>fl/fl</sup> littermate controls. Histological analyses revealed that all of these liver tumors were HCCs (Fig 2C). These HCCs were characterized by expansive growth, increased cellularity and neutrophil infiltration and the absence of portal tracts, as compared to non-tumorous areas. Immunohistochemical (IHC) staining revealed that these HCCs exhibited significant cell proliferation, as indicated by elevated Ki-67 and PCNA expression (Fig 2D). Interestingly, PCNA positivity was much higher than Ki67 positivity in the pathological examination. Although both PCNA and Ki-67 are biomarkers for cell proliferation in tumors, PCNA is an accessory protein for DNA polymerase-alpha required for DNA synthesis, and has a key role in cell cycle initiation, while the expression of Ki-67 reflects the number of proliferating cells in a tissue. Non-dividing or “resting” cells in the G0 phase are Ki-67 antigen negative. Thus, the finding that PCNA positivity was much higher than Ki67 positivity in the *Arid1a*<sup>LKO</sup> mice reflects that the more DNA replication and mitotic activity in G0/S phases, not cell division, occurs in HCC cells in the absence of *Arid1a*. Genotypes of these HCC samples, including tumor cells harvested by LCM, showed that these tumors were mainly composed of *Arid1a*-deficient cells (Fig 2E). Some known molecular markers CD133, AFP and DLK1 were upregulated in these tumors (Fig 2F).

### Arid1a deficiency enhances diethylnitrosamine (DEN)-induced hepatocarcinogenesis

In order to further ascertain the role of *Arid1a* in liver tumorigenesis, we analyzed the susceptibility of *Arid1a*<sup>LKO</sup> mice to the carcinogen DEN. DEN is used to generate a multistage hepatocarcinogenesis murine model, which might partly mimic human HCC tumorigenesis [38, 39].

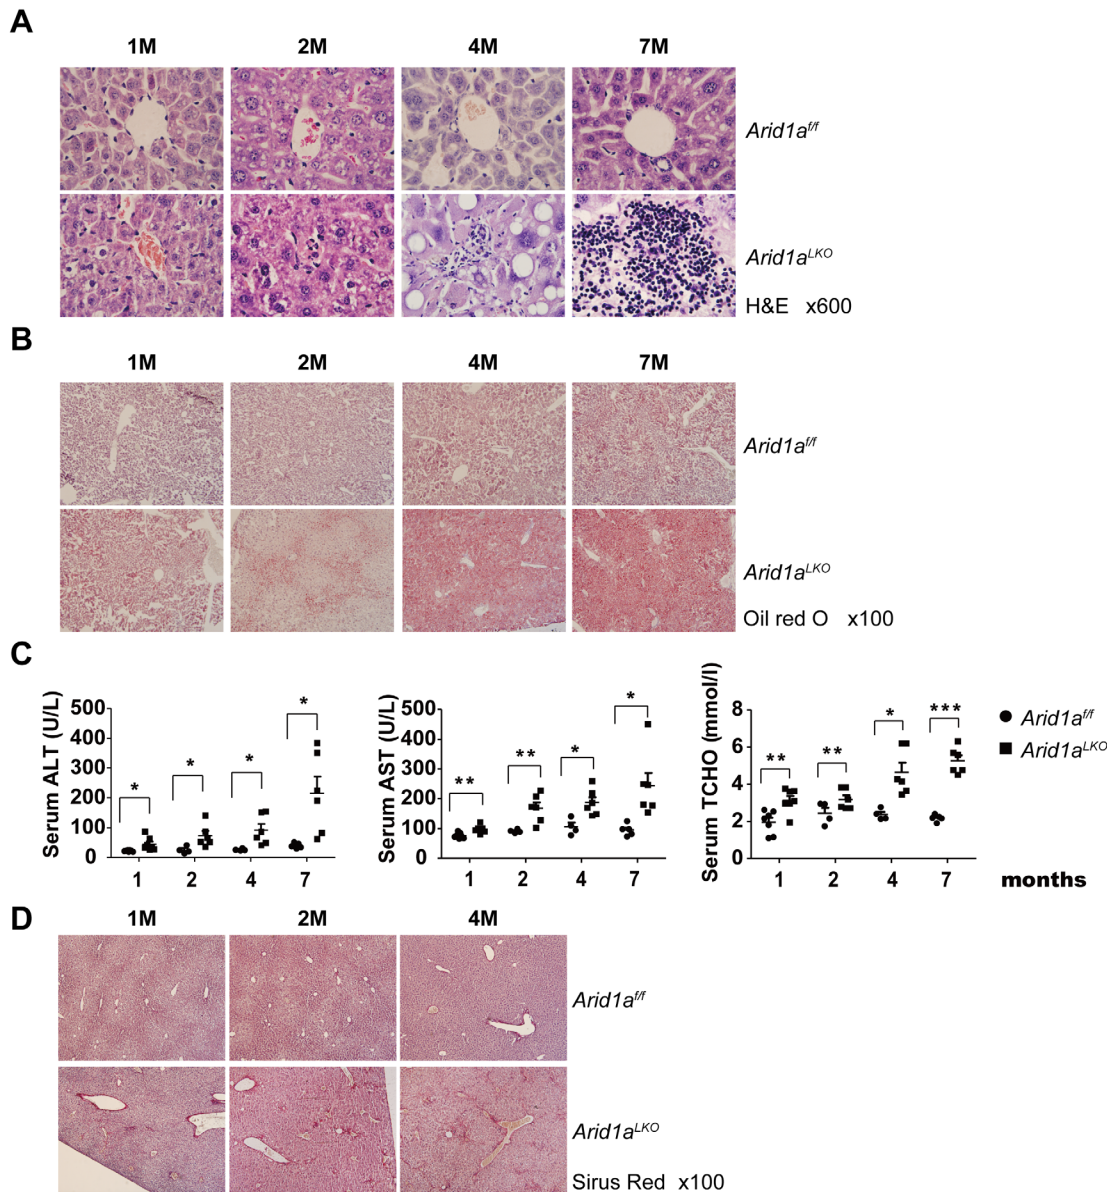

**Fig 1. *Arid1a* deficiency promotes steatohepatitis development in *Arid1a<sup>LKO</sup>* mice.** (A). Liver sections from 1, 2, 4 and 7 month (M) old *Arid1a<sup>LKO</sup>* mice and their littermates (*Arid1a<sup>fl/fl</sup>*) as controls were stained using Hematoxylin and eosin (H&E). (B). Oil red O staining on liver sections from 1, 2, 4 and 7 month old *Arid1a<sup>LKO</sup>* mice and their *Arid1a<sup>fl/fl</sup>* littermates as controls. (C). Serum alanine aminotransferase (ALT), aspartate aminotransferase (AST) and total cholesterol (TCHO) levels in 1, 2, 4 and 7 month old *Arid1a<sup>LKO</sup>* and *Arid1a<sup>fl/fl</sup>* mice. Each spot represents the measured value from each individual of two genotype groups, where each subgroup in the 4 different age groups contained a minimum of 4 individuals. The data are shown as the means  $\pm$  SEM. Statistical significance among the experimental groups was assessed using an unpaired two-sample Student's *t*-test. \**P* < 0.05; \*\**P* < 0.01; and \*\*\**P* < 0.001. (D). Liver sections from 1, 2 and 4 month old *Arid1a<sup>LKO</sup>* mice and control littermates (*Arid1a<sup>fl/fl</sup>*) were stained with Sirius red.

doi:10.1371/journal.pone.0143042.g001

Significantly, a single intraperitoneal injection of DEN increased tumor incidence and the number of macroscopic tumor nodules on the liver surface of *Arid1a<sup>LKO</sup>* mice at the ninth months after DEN administration as compared to *Arid1a<sup>fl/fl</sup>* littermates (Fig 3A–3C), revealing that *Arid1a* deficiency enhances DEN-induced hepatocarcinogenesis. Levels of serum ALT in *Arid1a<sup>LKO</sup>* mice following DEN treatment were significantly higher than those in *Arid1a<sup>fl/fl</sup>* littermates (Fig 3D), indicating that *Arid1a*-deficient mice were sensitive to DEN-induced hepatic

**Table 3. Summary of liver pathological examination in Arid1a deficient mice.**

| Age (month)              | Steatosis               |                       | Ballooning              |                       | Lobular Inflammation    |                       | Portal Inflammation     |                       | NAI                     |                       |
|--------------------------|-------------------------|-----------------------|-------------------------|-----------------------|-------------------------|-----------------------|-------------------------|-----------------------|-------------------------|-----------------------|
|                          | Arid1a <sup>fl/fl</sup> | Arid1a <sup>LKO</sup> | Arid1a <sup>fl/fl</sup> | Arid1a <sup>LKO</sup> | Arid1a <sup>fl/fl</sup> | Arid1a <sup>LKO</sup> | Arid1a <sup>fl/fl</sup> | Arid1a <sup>LKO</sup> | Arid1a <sup>fl/fl</sup> | Arid1a <sup>LKO</sup> |
| 1 (7,5) <sup>#</sup>     | 0.00                    | 0.00                  | 0.6±0.54                | 1.6±0.017*            | 1±0.71                  | 1.6±0.09              | 0.2±0.45                | 1.6±0.001**           | 1.43±0.74               | 4.8±0.84***           |
| 4 (10,12) <sup>#</sup>   | 0.7±0.67                | 0.83±0.83             | 0.9±0.99                | 1.5±0.9**             | 1.3±1.15                | 2.5±0.9***            | 0.1±0.32                | 0.67±0.65**           | 2±1.53                  | 6.3±1.3***            |
| 7 (10,7) <sup>#</sup>    | 0.6±0.51                | 1.14±1.06             | 0.5±0.52                | 1.42±1.13*            | 1.4±1.17                | 2.57±1.13             | 0.00                    | 0.42±0.53*            | 2.7±1.3                 | 5.57±2.07**           |
| 10 (17,20) <sup>#</sup>  | 0.65±0.71               | 1.55±1.09**           | 1.71±1.05               | 1.75±0.79             | 1.35±1.17               | 2.8±0.62***           | 0.35±0.078              | 1±0.46***             | 3.81±1.73               | 7.1±1.58***           |
| >10 (13,15) <sup>#</sup> | 0.54±0.66               | 1.67±1.18**           | 0.92±0.95               | 1.67±0.91*            | 0.92±0.95               | 2.53±0.92***          | 0.15±0.38               | 1.2±0.68***           | 2.53±1.06               | 7.06±2.05***          |

Pathological hepatic NAFLD (Non-alcoholic fatty liver disease) scores in each mouse group. The criteria for each score are described under Materials and Methods. NAI: NASH (nonalcoholic steatohepatitis) activity index, the sums of the four scores-steatosis, ballooning, lobular inflammation and portal inflammation. Results are showed as the mean ± s.d.

<sup>#</sup> The numbers in parentheses indicate the mouse numbers of Arid1a<sup>fl/fl</sup> and Arid1a<sup>LKO</sup> groups, respectively.

\* P < 0.05, Arid1a<sup>LKO</sup> versus Arid1a<sup>fl/fl</sup> mice.

\*\* P < 0.01, Arid1a<sup>LKO</sup> versus Arid1a<sup>fl/fl</sup> mice.

\*\*\* P < 0.001, Arid1a<sup>LKO</sup> versus Arid1a<sup>fl/fl</sup> mice.

doi:10.1371/journal.pone.0143042.t003

damage and inflammation. Additionally, serum IL-6 and TNF-α were also significantly elevated in 4 month old Arid1a<sup>LKO</sup> mice (Fig 3E and 3F). These data suggest that Arid1a deficiency may enhance DEN-induced hepatocarcinogenesis by enhancing hepatic damage and liver inflammation, which are accompanied by excessive proinflammatory cytokine production.

### Increased proinflammatory cytokine release and innate immune cell infiltration in the livers of Arid1a-deficient mice

Chronic liver inflammation is a common trigger of liver diseases, including liver fibrogenesis and HCC development [40, 41]. Innate immune cells may initiate and maintain hepatic inflammation responses via proinflammatory cytokine production [42]. In the present study, we found that 1–7 month old Arid1a<sup>LKO</sup> mice displayed liver inflammation that was characterized by elevated serum ALT levels (Fig 1C) and immune cell infiltration into the liver parenchyma (Fig 1A). These findings were supported by flow cytometric analyses indicating that CD45-positive leukocytes were significantly increased in these mice livers (Fig 4A). Flow cytometry was further employed to distinguish infiltrated inflammatory cells. As shown in Fig 4B and S2A Fig, F4/80<sup>+</sup> macrophages and CD11c<sup>+</sup> neutrophil cells, but not CD19- and CD3-positive cells, were increased in the livers of 1 and 4 month old Arid1a<sup>LKO</sup> mice as compared to their Arid1a<sup>fl/fl</sup> littermates. IHC staining also revealed that the levels of F4/80<sup>+</sup> macrophages gradually increased in the livers of 1–4 month old Arid1a<sup>LKO</sup> mice (Fig 4C). These data indicated that the livers of Arid1a<sup>LKO</sup> mice were infiltrated by innate immune cells.

We next assessed serum levels of the proinflammatory cytokines IL-6 and TNF-α, which are considered to be the most important cytokines that promote HCC tumorigenesis [43, 44]. Significantly, these two proinflammatory cytokines were markedly elevated in Arid1a<sup>LKO</sup> mice (Fig 4D). We further measured the transcripts of some known proinflammatory cytokines and chemokines in the livers of the mice using real-time RT-PCR. In addition to IL-6 and TNF-α, mRNA levels of IFN-γ, Ccl1, Ccl9, Ccl12, and Cxcl11 were also significantly elevated in Arid1a<sup>LKO</sup> mice as compared to their littermates (S2B Fig). These data suggested that proinflammatory cytokines and chemokines were maladjusted in Arid1a<sup>LKO</sup> mice.



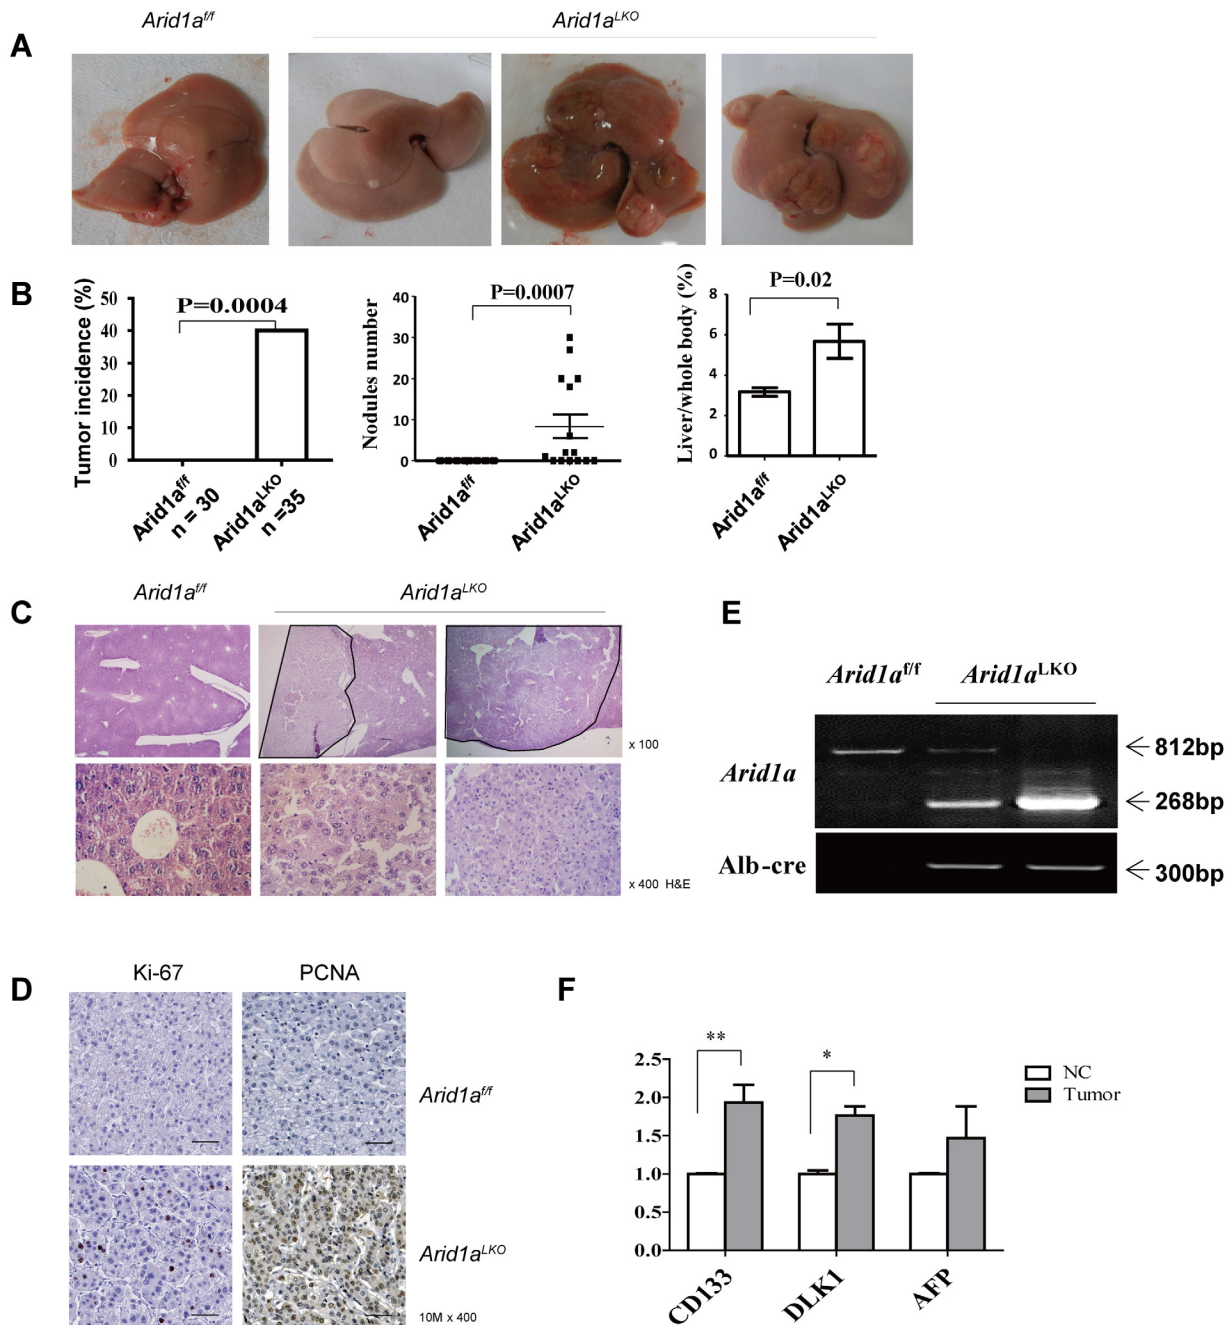

**Fig 2. *Arid1a* deficiency promotes HCC development in *Arid1a<sup>LKO</sup>* mice.** (A). Representative macroscopic livers from a 10 month old *Arid1a<sup>fl/fl</sup>* mouse (left), as well as 10, 14, and 17 month old *Arid1a<sup>LKO</sup>* male mice (right). Livers of *Arid1a<sup>LKO</sup>* mice show single or multiple tumor nodules. (B). Tumor incidence (left) was statistically analyzed by  $\kappa$ -test. Tumor nodule number (middle) and liver/body weight (right) were statistically analyzed using an unpaired two-sample Student's *t*-test. The data are shown as the means  $\pm$  SEM. *P* values are shown in the upper. (C). Representative microscopic histology of liver tumors in *Arid1a<sup>LKO</sup>* mice was examined under H&E staining by magnification of 100 (upper) and 400 times (lower), where the liver of an *Arid1a<sup>fl/fl</sup>* littermate was used as a control. (D). Immunohistochemical staining with antibodies raised against Ki-67 and PCNA was performed on liver tumor sections of 10 month old *Arid1a<sup>LKO</sup>* mice. A liver section from an *Arid1a<sup>fl/fl</sup>* littermate was used as a control. (E). DNA from HCC samples were harvested by Laser capture microdissection (LCM), and genotyping were performed with PCR. (F). Expression levels of *CD133*, *DLK1* and *AFP* were measured in tumors and the adjacent non-cancerous livers (NC) of *Arid1a* deficiency mice using quantitative RT-PCR. Each group contained a minimum of 3 individuals. The data are shown as the means  $\pm$  SEM. Statistical analysis was performed using two-way ANOVA. \**P* < 0.05, \*\**P* < 0.01, and \*\*\**P* < 0.001.

doi:10.1371/journal.pone.0143042.g002

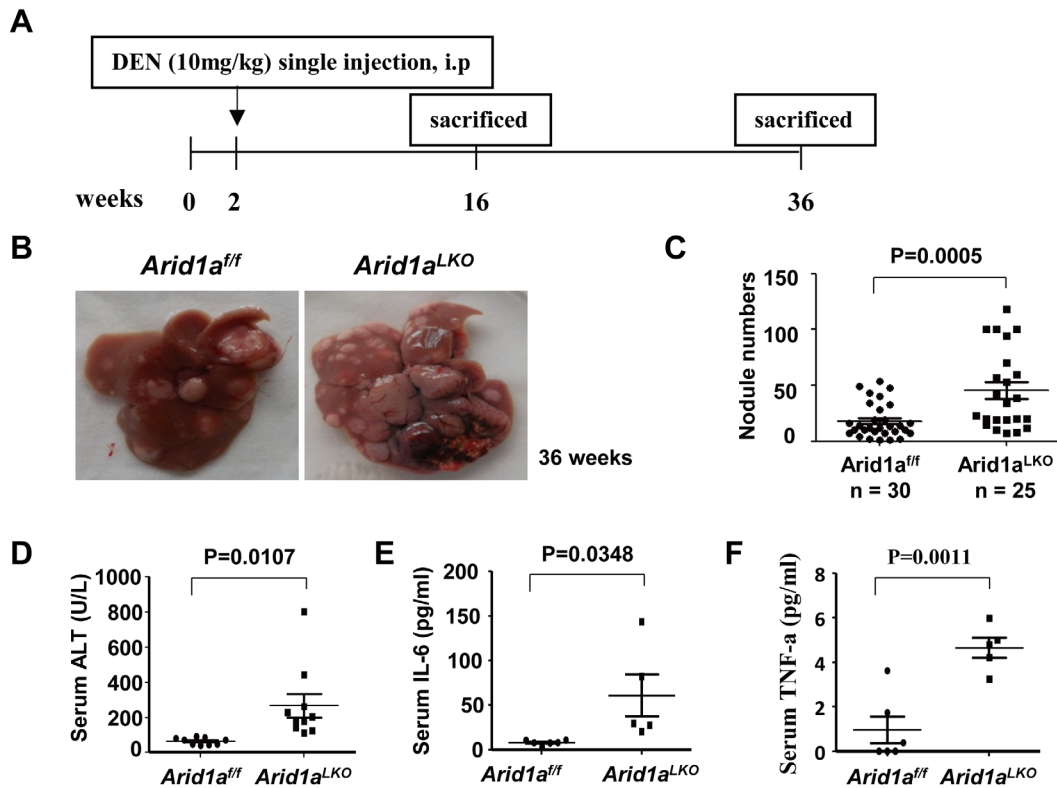

**Fig 3. Increased HCC tumorigenesis in DEN-treated *Arid1a*<sup>LKO</sup> mice (A).** A brief scheme illustrating DEN-induced HCC experiments in *Arid1a*<sup>LKO</sup> mice and *Arid1a*<sup>fl/fl</sup> littermates. (B). Representative macroscopic livers from 9 month old male *Arid1a*<sup>fl/fl</sup> (left) and *Arid1a*<sup>LKO</sup> mice (right). Multiple larger tumor nodules on the surface of the livers of *Arid1a*<sup>LKO</sup> mice are shown. (C). Tumor nodules were counted and statistically analyzed using an unpaired two-sample Student's *t*-test. The data are shown as the means ± SEM. The *P* value is shown above compared groups. (D-F). Serum ALT (D), IL-6 (E) and TNF-α (F) levels in 4 month old *Arid1a*<sup>LKO</sup> and *Arid1a*<sup>fl/fl</sup> mice. Each spot represents the measured value from each individual of two genotype groups, where each group contains a minimum of 5 individuals. The data are shown as the means ± SEM. Statistical analysis was performed using an unpaired two-sample Student's *t*-test. *P* values are shown above compared groups.

doi:10.1371/journal.pone.0143042.g003

As previously reported, increased proinflammatory cytokine and/or chemokine production may activate the STAT3 and NF-κB pathways, which are known to be closely associated with HCC development [45]. In the present study, we further examined the intracellular STAT3 and NF-κB pathways by detecting phosphorylated STAT3 and IκBα. As expected, phosphorylated STAT3 and IκBα were obviously elevated in the livers of *Arid1a*<sup>LKO</sup> mice (Fig 4E), suggesting that the STAT3 and NF-κB pathways could be activated by the release of proinflammatory cytokines and/or chemokines, which may further lead to HCC development in the livers of *Arid1a*<sup>LKO</sup> mice.

Lipopolysaccharide (LPS) has been shown to activate macrophages and neutrophils to release proinflammatory factors by binding to TLR4, and recent studies have revealed that LPS from Gram-negative bacteria in the gut flora may enhance liver inflammation, hepatic damage and HCC promotion [46, 47]. To further assess whether LPS can enhance hepatic damage and liver inflammation, *Arid1a*<sup>LKO</sup> mice were treated with a single LPS dose intraperitoneally. Interestingly, 48 hours after LPS administration, the death rate of these mice was significantly higher than that of their *Arid1a*<sup>fl/fl</sup> littermates (Fig 5A). We also examined the livers of *Arid1a*<sup>LKO</sup> mice after LPS administration, which exhibited massive necrosis at 24 hours (Fig 5B). In parallel, serum ALT levels in *Arid1a*<sup>LKO</sup> mice were significantly higher than those of their *Arid1a*<sup>fl/fl</sup> littermates after lower dose LPS administration (Fig 5C). Interestingly, serum IL-6

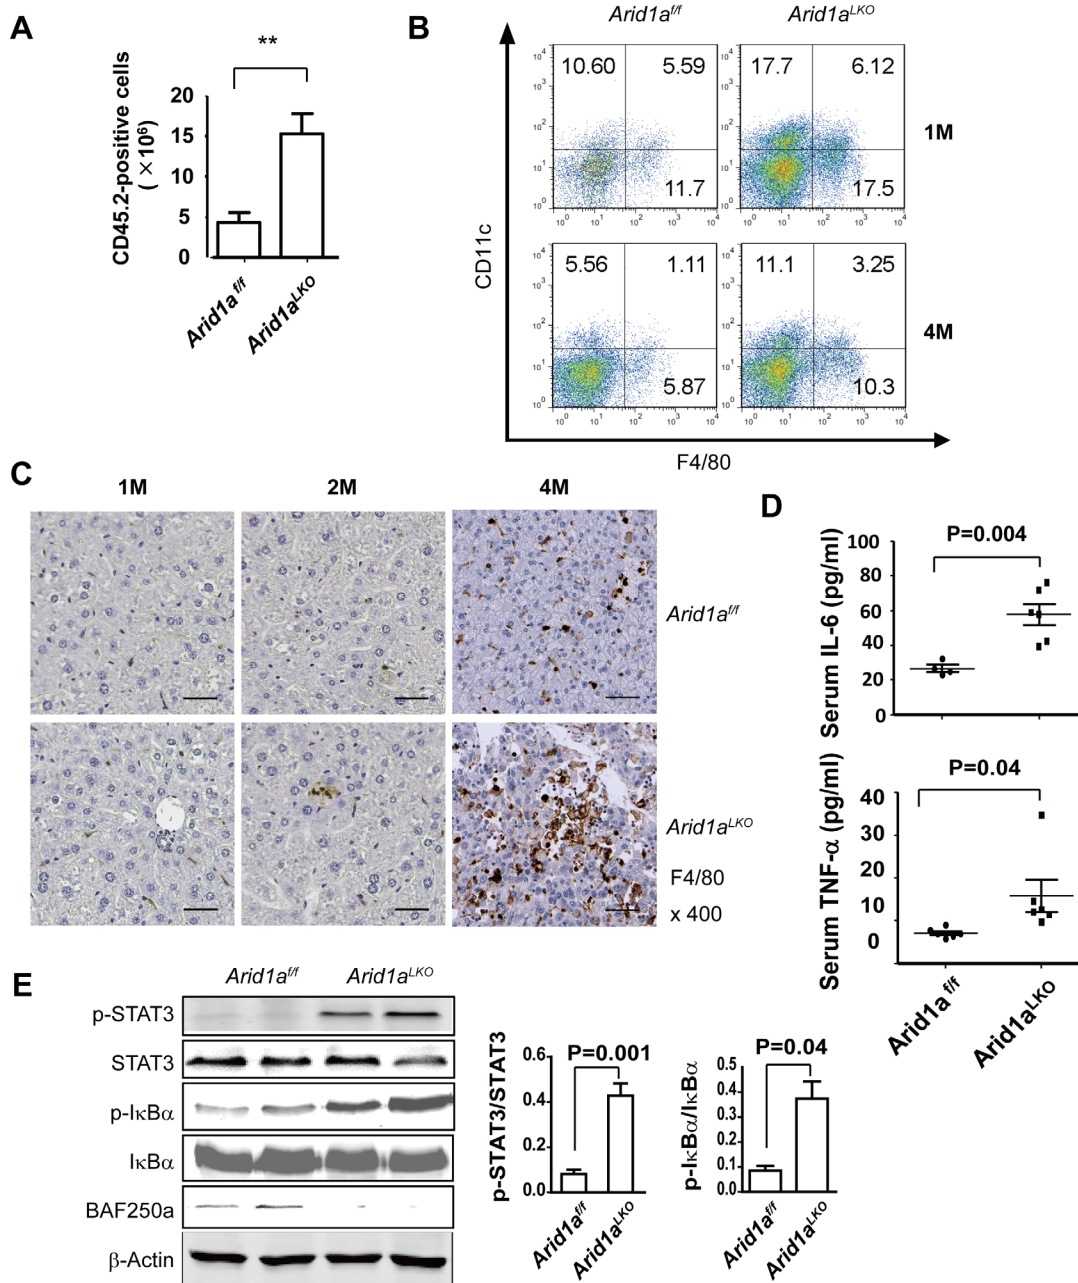

**Fig 4. Innate immune cell infiltration in livers of *Arid1a<sup>LKO</sup>* mice.** (A). Flow cytometric (FACS) analysis of liver nonparenchymal cells (NPCs) from 1 month old *Arid1a<sup>LKO</sup>* and *Arid1a<sup>fl/fl</sup>* mice was performed using an anti-CD45.2 antibody to count the number of infiltrated CD45-positive leukocytes in the livers. The data are shown as the means ± SEM. Statistical analysis was performed using an unpaired two-sample Student's *t*-test. \*\**P* < 0.01. (B). FACS analysis of liver NPCs from 1 and 4 month old *Arid1a<sup>LKO</sup>* and *Arid1a<sup>fl/fl</sup>* mice was used to assess macrophage and neutrophil numbers with anti-F4/80 and CD11c antibodies, respectively. The numbers represent the percentages of macrophages or neutrophil leukocytes in liver NPCs. (C). Representative Immunohistochemical analysis using an anti-F4/80 antibody on liver sections from 1, 2 and 4 month old *Arid1a<sup>LKO</sup>* and *Arid1a<sup>fl/fl</sup>* mice. (D). Serum IL-6 and TNF-α levels in 1 month old *Arid1a<sup>LKO</sup>* mice and their *Arid1a<sup>fl/fl</sup>* littermates. Each spot represents the measured value from each individual of two genotype groups, in which each group contained 5–7 individuals. The data are shown as the means ± SEM. Statistical analysis was performed using an unpaired two-sample Student's *t*-test. *P* values are shown above compared groups. (E). Western blot analysis of protein extracts from the livers of 1 month old *Arid1a<sup>LKO</sup>* and *Arid1a<sup>fl/fl</sup>* mice was performed using anti-STAT3, phosphorylated-STAT3, IκBα and phosphorylated-IκBα antibodies. Relative phosphorylation levels were shown on the right. The phosphorylation levels of the proteins were evaluated based on intensity of their bands. Each group has 6 mice, and the represented data was showed. BAF250a was used to evaluate the samples and β-actin was used as an internal control. The data are shown as the means ± SEM. Statistical analysis was performed using an unpaired two-sample Student's *t*-test. *P* values are shown above compared groups.

doi:10.1371/journal.pone.0143042.g004

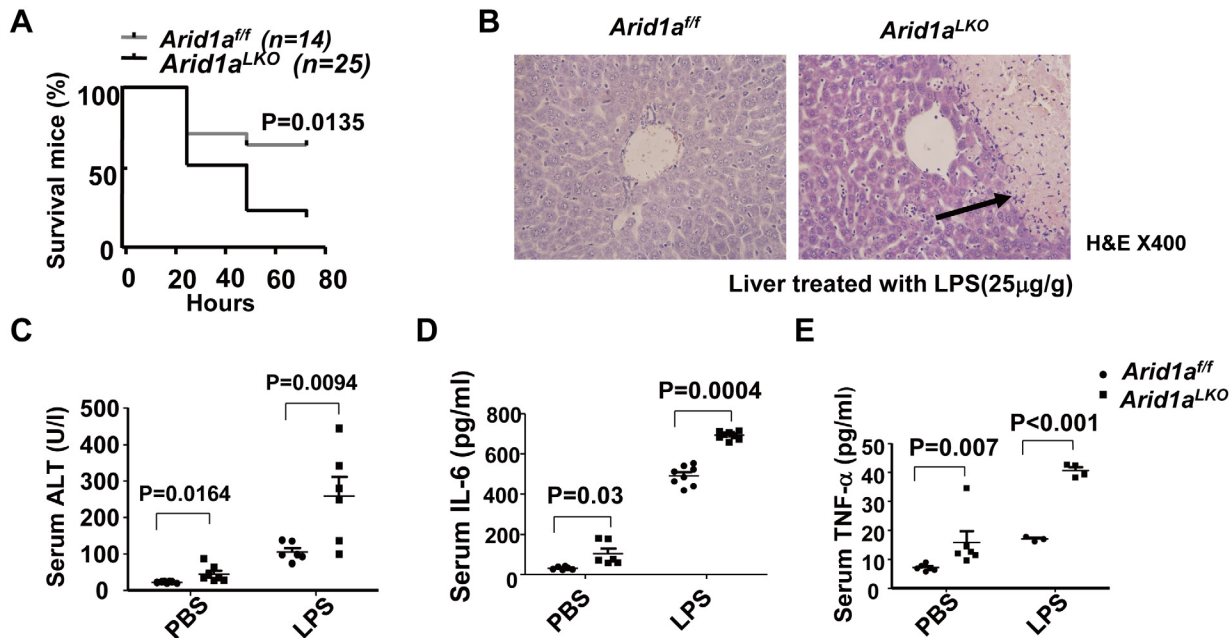

**Fig 5. *Arid1a* deficiency enhances LPS induced hepatitis.** (A). LPS lethality experiments in *Arid1a<sup>LKO</sup>* and *Arid1a<sup>ff</sup>* mice. Survival curves were statistically analyzed using two-way ANOVA. (B). H&E staining on livers from LPS-treated *Arid1a<sup>LKO</sup>* and *Arid1a<sup>ff</sup>* mice. (C-E). Serum ALT (C), IL-6 (D) and TNF-α (E) levels were measured in *Arid1a<sup>LKO</sup>* and *Arid1a<sup>ff</sup>* mice following LPS administration, where PBS was used as a negative control. Each spot represents the measured value from each individual of two genotype groups, in which each group contained 3–8 individuals. The data are shown as the means ± SEM. Statistical analysis was performed using an unpaired two-sample Student's *t*-test. *P* values are shown above compared groups.

doi:10.1371/journal.pone.0143042.g005

and TNF-α were significantly elevated in *Arid1a<sup>LKO</sup>* mice (Fig 5D and 5E). These data suggested that LPS from the gut flora could enhance hepatic damage and liver inflammation in *Arid1a<sup>LKO</sup>* mice, possibly by triggering macrophage and neutrophil infiltration in the liver, thereby promoting HCC development in *Arid1a*-deficient mice [46].

## Discussion

Human HCC has been well known to be closely associated with multiple risk factors, such as persistent hepatitis infection, chronic alcohol consumption and aflatoxin B1 exposure [48, 49]. Additionally, metabolic disorders, such as diabetes and obesity, are also considered as risk factors for liver cancer [50, 51]. Regardless of the etiology, the neoplastic lesions usually originate on a bed of chronic inflammation that sequentially progresses from fibrosis to cirrhosis and finally culminates in HCC [49, 52]. It is general recognized that chronic inflammation is closely associated with chronic liver injury, including apoptosis and/or necrosis.

As with any other neoplasia, HCC development also involves a series of genetic alterations, particularly somatic mutations. In addition to TERT [53], TP53 and β-catenin mutations, some genes encoding components of SWI/SNF complexes, such as ARID1A and ARID2, were also found to be frequently mutated in HCC [18, 19, 22]. However, the role and mechanisms underlying their loss of function mutations in HCC development are completely unclear. The clarification of a causal relationship between somatic mutations of SWI/SNF chromatin remodeling molecules and HCC development, including chronic liver damage and inflammation that remodel the pro-carcinogenic microenvironment, will be helpful in understanding the tumorigenic process.

The SWI/SNF chromatin remodeling complex, which have helicase and ATPase activities, regulates gene transcription by altering the chromatin structure [54]. Recently, certain genes

encoding components of SWI/SNF complexes, in particular *ARID1A*, have been reported to be frequently mutated in a wide variety of human cancers [55]. Based on genetically engineered mouse models, compelling evidence indicates that deficiencies in certain components of SWI/SNF complexes may contribute to tumor development. BRG1 (a core member of SWI/SNF complexes) haploinsufficient mice displayed a mildly tumor prone phenotype, with 10% of mice developing glandular tumors [55]. SNF (another core subunit of SWI/SNF complexes) deficient mice also developed lymphoma and pancytopenia [56]. In ovarian cancer, *ARID1A* deficiency alone is not sufficient for promoting tumorigenesis, it requires PIK3CA co-activation [24, 25]. In the present study, we demonstrated that hepatocyte-specific *Arid1a* deficiency results in HCC development in a murine model. Significantly, as with human HCC, animals in the *Arid1a* deficiency-induced murine HCC model undergo chronic liver damage and inflammation, steatohepatitis, hepatocyte dysplasia, and ultimately develop HCC, implying that human ARID1A loss of function mutations or decreases may be a critical event that triggers a cascade culminating in HCC development. These data also suggest that chronic liver damage and inflammation induced by inactivated and dysregulated ARID1A may be an early requirement for HCC development.

In the *Arid1a* deficiency-driven HCC model, we found that chronic inflammation accumulates in hepatic lobules, which was characterized by the increased macrophages infiltration, the elevated cytokines such as IL-6 and TNF- $\alpha$  and chemokines, and the activated JAK-STAT3 and NF- $\kappa$ B signaling pathways. The liver inflammation with excess proinflammation cytokines shape cancer-promoting microenvironment. It should be pointed out that IL-6 has been proven to be closely associated with the development of hepatic steatosis and inflammation [57]. Previous studies have demonstrated that IL-6 produced by Kupffer cells or macrophages plays a crucial role in HCC development [41, 58]. The hepatic progenitor cells were expanded through the acquired autocrine IL-6 signaling that stimulates malignant transformation and progression of HCC [59]. The underlying mechanism involved in the *Arid1a* deficiency-driven HCC could be associated with the activated IL-6 signaling. A recent report also revealed that both *Arid1a* and *PIK3CA* mutations may cooperatively promote tumour development through the sustained IL-6 overproduction in ovary cancer, indicated by a mouse model [24, 25], where *Arid1a* protects against the inflammation-driven tumorigenesis, which is similar to our found in the *Arid1a* deficiency-driven HCC. Recently, IL-6 and some components involved in IL-6/STAT3 pathway are considered as the therapeutic targets, because the inhibition of IL-6/STAT3 pathway may attenuate the HCC cell survival upon IL-6 production [60].

Apart from the activated IL-6/STAT3 pathway, *Arid1a* deficiency also may disrupt the structure and functions of SWI/SNF chromatin remodeling complex, leading to genomic instability, which could contribute to HCC tumorigenesis. However, the detail underlying mechanism involved in genomic instability and cancer-promoting microenvironment in the *Arid1a* deficiency-driven HCC model should be further investigated.

In conclusion, *Arid1a* deficiency leads to the stimulation of innate immune cells, including monocytes, Kupffer cells and neutrophils, to produce proinflammatory cytokines, such as IL-6 and TNF- $\alpha$ , which promote steatohepatitis and HCC development.

## Supporting Information

**S1 Fig. *Arid1a* deficiency promotes steatohepatitis.** (A). Genotypes of *Arid1a*<sup>LKO</sup> and *Arid1a*<sup>ff</sup> mice were identified in livers by PCR. (B). *Arid1a*/BAF250 protein expression in livers of *Arid1a*<sup>LKO</sup> and *Arid1a*<sup>ff</sup> mice was evaluated by Western blotting assay. (C). LDL-C and HDL-C levels in 1-month-old *Arid1a*<sup>LKO</sup> and *Arid1a*<sup>ff</sup> mice. The data are shown as the means  $\pm$  SEM. Statistical significance among the experimental groups was assessed using an

unpaired two-sample Student's *t*-test.  $^{**}P < 0.01$ . (D). Liver sections from 1, 2, 4 and 7 month old *Arid1a*<sup>LKO</sup> mice and their *Arid1a*<sup>fl/fl</sup> littermates as controls were stained with H&E. (TIF)

**S2 Fig. Enhanced inflammatory response in *Arid1a*<sup>LKO</sup> mice.** (A). FACS analysis of NPCs from 1-month-old and 4-months-old *Arid1a*<sup>LKO</sup> and *Arid1a*<sup>fl/fl</sup> mouse livers was performed with anti-CD3 and CD19 fluorescent conjugated antibodies. (B). The mRNA expression levels of some cytokines and chemokines were detected in livers from 4-weeks-old *Arid1a*<sup>LKO</sup> and *Arid1a*<sup>fl/fl</sup> mice by quantitative real-time RT-PCR. The mRNA expression levels from *Arid1a*<sup>fl/fl</sup> mice were normalized as control. Results are shown as mean, error bars indicate standard error of the mean (SEM).  $^{*}P < 0.05$ ;  $^{**}P < 0.01$  (n = 3 each genotype). (TIF)

## Acknowledgments

We gratefully acknowledge support from Li-Yu Huang, Chun-Miao Cai, Zhuang-Zhuang Zhang, Bao-Feng Wei, Bing-Hao Wu, Yu-Ping Wang, Xiao Xu and Jin-Shan Li for assistance with some of the experiments.

## Author Contributions

Conceived and designed the experiments: Z-GH J-ZF. Performed the experiments: J-ZF X-YL CL T-TH. Analyzed the data: Z-GH J-ZF. Contributed reagents/materials/analysis tools: Z-GH J-ZF. Wrote the paper: Z-GH Z-SF J-ZF.

## References

1. Wiegand KC, Shah SP, Al-Agha OM, Zhao Y, Tse K, Zeng T, et al. ARID1A mutations in endometriosis-associated ovarian carcinomas. *The New England journal of medicine*. 2010; 363(16):1532–43. doi: [10.1056/NEJMoa1008433](https://doi.org/10.1056/NEJMoa1008433) PMID: [20942669](https://pubmed.ncbi.nlm.nih.gov/20942669/); PubMed Central PMCID: [PMC2976679](https://pubmed.ncbi.nlm.nih.gov/PMC2976679/).
2. Jones S, Wang TL, Shih le M, Mao TL, Nakayama K, Roden R, et al. Frequent mutations of chromatin remodeling gene ARID1A in ovarian clear cell carcinoma. *Science*. 2010; 330(6001):228–31. doi: [10.1126/science.1196333](https://doi.org/10.1126/science.1196333) PMID: [20826764](https://pubmed.ncbi.nlm.nih.gov/20826764/); PubMed Central PMCID: [PMC3076894](https://pubmed.ncbi.nlm.nih.gov/PMC3076894/).
3. Jones S, Li M, Parsons DW, Zhang X, Wesseling J, Kristel P, et al. Somatic mutations in the chromatin remodeling gene ARID1A occur in several tumor types. *Human mutation*. 2012; 33(1):100–3. PMID: [22009941](https://pubmed.ncbi.nlm.nih.gov/22009941/); PubMed Central PMCID: [PMC3240719](https://pubmed.ncbi.nlm.nih.gov/PMC3240719/).
4. Zang ZJ, Cutcutache I, Poon SL, Zhang SL, McPherson JR, Tao J, et al. Exome sequencing of gastric adenocarcinoma identifies recurrent somatic mutations in cell adhesion and chromatin remodeling genes. *Nature genetics*. 2012; 44(5):570–4. doi: [10.1038/ng.2246](https://doi.org/10.1038/ng.2246) PMID: [22484628](https://pubmed.ncbi.nlm.nih.gov/22484628/).
5. Comen S, Adelaide J, Bertucci F, Finetti P, Guille A, Birnbaum DJ, et al. Mutations and deletions of ARID1A in breast tumors. *Oncogene*. 2012; 31(38):4255–6. doi: [10.1038/onc.2011.598](https://doi.org/10.1038/onc.2011.598) PMID: [22249247](https://pubmed.ncbi.nlm.nih.gov/22249247/).
6. Mamo A, Cavallone L, Tuzmen S, Chabot C, Ferrario C, Hassan S, et al. An integrated genomic approach identifies ARID1A as a candidate tumor-suppressor gene in breast cancer. *Oncogene*. 2012; 31(16):2090–100. doi: [10.1038/onc.2011.386](https://doi.org/10.1038/onc.2011.386) PMID: [21892209](https://pubmed.ncbi.nlm.nih.gov/21892209/).
7. Birnbaum DJ, Adelaide J, Mamessier E, Finetti P, Lagarde A, Monges G, et al. Genome profiling of pancreatic adenocarcinoma. *Genes, chromosomes & cancer*. 2011; 50(6):456–65. PMID: [21412932](https://pubmed.ncbi.nlm.nih.gov/21412932/).
8. Shain AH, Giacomini CP, Matsukuma K, Karikari CA, Bashyam MD, Hidalgo M, et al. Convergent structural alterations define SWI/SNF/Sucrose NonFermentable (SWI/SNF) chromatin remodeler as a central tumor suppressive complex in pancreatic cancer. *Proceedings of the National Academy of Sciences of the United States of America*. 2012; 109(5):E252–9. doi: [10.1073/pnas.1114817109](https://doi.org/10.1073/pnas.1114817109) PMID: [22233809](https://pubmed.ncbi.nlm.nih.gov/22233809/); PubMed Central PMCID: [PMC3277150](https://pubmed.ncbi.nlm.nih.gov/PMC3277150/).
9. Jiao Y, Pawlik TM, Anders RA, Selaru FM, Streppel MM, Lucas DJ, et al. Exome sequencing identifies frequent inactivating mutations in BAP1, ARID1A and PBRM1 in intrahepatic cholangiocarcinomas. *Nature genetics*. 2013; 45(12):1470–3. doi: [10.1038/ng.2813](https://doi.org/10.1038/ng.2813) PMID: [24185509](https://pubmed.ncbi.nlm.nih.gov/24185509/); PubMed Central PMCID: [PMC4013720](https://pubmed.ncbi.nlm.nih.gov/PMC4013720/).

10. Chan-On W, Nairismagi ML, Ong CK, Lim WK, Dima S, Pairojkul C, et al. Exome sequencing identifies distinct mutational patterns in liver fluke-related and non-infection-related bile duct cancers. *Nature genetics*. 2013; 45(12):1474–8. doi: [10.1038/ng.2806](https://doi.org/10.1038/ng.2806) PMID: [24185513](https://pubmed.ncbi.nlm.nih.gov/24185513/).
11. Cancer Genome Atlas Research N. Comprehensive molecular characterization of clear cell renal cell carcinoma. *Nature*. 2013; 499(7456):43–9. doi: [10.1038/nature12222](https://doi.org/10.1038/nature12222) PMID: [23792563](https://pubmed.ncbi.nlm.nih.gov/23792563/); PubMed Central PMCID: PMC3771322.
12. Dulak AM, Stojanov P, Peng S, Lawrence MS, Fox C, Stewart C, et al. Exome and whole-genome sequencing of esophageal adenocarcinoma identifies recurrent driver events and mutational complexity. *Nature genetics*. 2013; 45(5):478–86. doi: [10.1038/ng.2591](https://doi.org/10.1038/ng.2591) PMID: [23525077](https://pubmed.ncbi.nlm.nih.gov/23525077/); PubMed Central PMCID: PMC3678719.
13. Sausen M, Leary RJ, Jones S, Wu J, Reynolds CP, Liu X, et al. Integrated genomic analyses identify ARID1A and ARID1B alterations in the childhood cancer neuroblastoma. *Nature genetics*. 2013; 45(1):12–7. doi: [10.1038/ng.2493](https://doi.org/10.1038/ng.2493) PMID: [23202128](https://pubmed.ncbi.nlm.nih.gov/23202128/); PubMed Central PMCID: PMC3557959.
14. Zhang J, Grubor V, Love CL, Banerjee A, Richards KL, Mieczkowski PA, et al. Genetic heterogeneity of diffuse large B-cell lymphoma. *Proceedings of the National Academy of Sciences of the United States of America*. 2013; 110(4):1398–403. doi: [10.1073/pnas.1205299110](https://doi.org/10.1073/pnas.1205299110) PMID: [23292937](https://pubmed.ncbi.nlm.nih.gov/23292937/); PubMed Central PMCID: PMC3557051.
15. Gui Y, Guo G, Huang Y, Hu X, Tang A, Gao S, et al. Frequent mutations of chromatin remodeling genes in transitional cell carcinoma of the bladder. *Nature genetics*. 2011; 43(9):875–8. doi: [10.1038/ng.907](https://doi.org/10.1038/ng.907) PMID: [21822268](https://pubmed.ncbi.nlm.nih.gov/21822268/).
16. Abe H, Maeda D, Hino R, Otake Y, Isogai M, Ushiku AS, et al. ARID1A expression loss in gastric cancer: pathway-dependent roles with and without Epstein-Barr virus infection and microsatellite instability. *Virchows Archiv: an international journal of pathology*. 2012; 461(4):367–77. doi: [10.1007/s00428-012-1303-2](https://doi.org/10.1007/s00428-012-1303-2) PMID: [22915242](https://pubmed.ncbi.nlm.nih.gov/22915242/).
17. Liang H, Cheung LW, Li J, Ju Z, Yu S, Stemke-Hale K, et al. Whole-exome sequencing combined with functional genomics reveals novel candidate driver cancer genes in endometrial cancer. *Genome research*. 2012; 22(11):2120–9. doi: [10.1101/gr.137596.112](https://doi.org/10.1101/gr.137596.112) PMID: [23028188](https://pubmed.ncbi.nlm.nih.gov/23028188/); PubMed Central PMCID: PMC3483541.
18. Guichard C, Amaddeo G, Imbeaud S, Ladeiro Y, Pelletier L, Maad IB, et al. Integrated analysis of somatic mutations and focal copy-number changes identifies key genes and pathways in hepatocellular carcinoma. *Nature genetics*. 2012; 44(6):694–8. doi: [10.1038/ng.2256](https://doi.org/10.1038/ng.2256) PMID: [22561517](https://pubmed.ncbi.nlm.nih.gov/22561517/).
19. Fujimoto A, Totoki Y, Abe T, Boroevich KA, Hosoda F, Nguyen HH, et al. Whole-genome sequencing of liver cancers identifies etiological influences on mutation patterns and recurrent mutations in chromatin regulators. *Nature genetics*. 2012; 44(7):760–4. doi: [10.1038/ng.2291](https://doi.org/10.1038/ng.2291) PMID: [22634756](https://pubmed.ncbi.nlm.nih.gov/22634756/).
20. Amaddeo G, Guichard C, Imbeaud S, Zucman-Rossi J. Next-generation sequencing identified new oncogenes and tumor suppressor genes in human hepatic tumors. *Oncimmunology*. 2012; 1(9):1612–3. doi: [10.4161/onci.21480](https://doi.org/10.4161/onci.21480) PMID: [23264911](https://pubmed.ncbi.nlm.nih.gov/23264911/); PubMed Central PMCID: PMC3525620.
21. Guan B, Gao M, Wu CH, Wang TL, Shih le M. Functional analysis of in-frame indel ARID1A mutations reveals new regulatory mechanisms of its tumor suppressor functions. *Neoplasia*. 2012; 14(10):986–93. PMID: [23097632](https://pubmed.ncbi.nlm.nih.gov/23097632/); PubMed Central PMCID: PMC3479842.
22. Huang J, Deng Q, Wang Q, Li KY, Dai JH, Li N, et al. Exome sequencing of hepatitis B virus-associated hepatocellular carcinoma. *Nature genetics*. 2012; 44(10):1117–21. doi: [10.1038/ng.2391](https://doi.org/10.1038/ng.2391) PMID: [22922871](https://pubmed.ncbi.nlm.nih.gov/22922871/).
23. He F, Li J, Xu J, Zhang S, Xu Y, Zhao W, et al. Decreased expression of ARID1A associates with poor prognosis and promotes metastases of hepatocellular carcinoma. *Journal of experimental & clinical cancer research: CR*. 2015; 34:47. doi: [10.1186/s13046-015-0164-3](https://doi.org/10.1186/s13046-015-0164-3) PMID: [25975202](https://pubmed.ncbi.nlm.nih.gov/25975202/); PubMed Central PMCID: PMC4440314.
24. Chandler RL, Damrauer JS, Raab JR, Schisler JC, Wilkerson MD, Didion JP, et al. Coexistent ARID1A-PIK3CA mutations promote ovarian clear-cell tumorigenesis through pro-tumorigenic inflammatory cytokine signalling. *Nature communications*. 2015; 6:6118. doi: [10.1038/ncomms7118](https://doi.org/10.1038/ncomms7118) PMID: [25625625](https://pubmed.ncbi.nlm.nih.gov/25625625/); PubMed Central PMCID: PMC4308813.
25. Guan B, Rahmanto YS, Wu RC, Wang Y, Wang Z, Wang TL, et al. Roles of deletion of *Arid1a*, a tumor suppressor, in mouse ovarian tumorigenesis. *Journal of the National Cancer Institute*. 2014; 106(7). doi: [10.1093/jnci/dju146](https://doi.org/10.1093/jnci/dju146) PMID: [24899687](https://pubmed.ncbi.nlm.nih.gov/24899687/); PubMed Central PMCID: PMC4056776.
26. Gao X, Tate P, Hu P, Tjian R, Skarnes WC, Wang Z. ES cell pluripotency and germ-layer formation require the SWI/SNF chromatin remodeling component BAF250a. *Proceedings of the National Academy of Sciences of the United States of America*. 2008; 105(18):6656–61. doi: [10.1073/pnas.0801802105](https://doi.org/10.1073/pnas.0801802105) PMID: [18448678](https://pubmed.ncbi.nlm.nih.gov/18448678/); PubMed Central PMCID: PMC2373334.
27. Lei I, Gao X, Sham MH, Wang Z. SWI/SNF protein component BAF250a regulates cardiac progenitor cell differentiation by modulating chromatin accessibility during second heart field development. *The*

- Journal of biological chemistry. 2012; 287(29):24255–62. doi: [10.1074/jbc.M112.365080](https://doi.org/10.1074/jbc.M112.365080) PMID: [22621927](https://pubmed.ncbi.nlm.nih.gov/22621927/); PubMed Central PMCID: PMC3397851.
28. Jia M, Jing Y, Ai Q, Jiang R, Wan J, Lin L, et al. Potential role of catalase in mice with lipopolysaccharide/D-galactosamine-induced fulminant liver injury. *Hepatology research: the official journal of the Japan Society of Hepatology*. 2014; 44(11):1151–8. PMID: [23941578](https://pubmed.ncbi.nlm.nih.gov/23941578/).
  29. Vlach KD, Boles JW, Stiles BG. Telemetric evaluation of body temperature and physical activity as predictors of mortality in a murine model of staphylococcal enterotoxigenic shock. *Comp Med*. 2000; 50(2):160–6. PMID: [10857007](https://pubmed.ncbi.nlm.nih.gov/10857007/).
  30. Boone DR, Micci MA, Tagliatalata IG, Hellmich JL, Weisz HA, Bi M, et al. Pathway-focused PCR array profiling of enriched populations of laser capture microdissected hippocampal cells after traumatic brain injury. *PloS one*. 2015; 10(5):e0127287. doi: [10.1371/journal.pone.0127287](https://doi.org/10.1371/journal.pone.0127287) PMID: [26016641](https://pubmed.ncbi.nlm.nih.gov/26016641/); PubMed Central PMCID: PMC4446038.
  31. Bumrungrathai S, Ekalaksananan T, Evans MF, Chopjitt P, Tangsirawatthana T, Patarapadungkit N, et al. Up-Regulation of miR-21 Is Associated with Cervicitis and Human Papillomavirus Infection in Cervical Tissues. *PloS one*. 2015; 10(5):e0127109. doi: [10.1371/journal.pone.0127109](https://doi.org/10.1371/journal.pone.0127109) PMID: [26010154](https://pubmed.ncbi.nlm.nih.gov/26010154/); PubMed Central PMCID: PMC4444121.
  32. Yimin, Furumaki H, Matsuoka S, Sakurai T, Kohanawa M, Zhao S, et al. A novel murine model for non-alcoholic steatohepatitis developed by combination of a high-fat diet and oxidized low-density lipoprotein. *Laboratory investigation; a journal of technical methods and pathology*. 2012; 92(2):265–81. doi: [10.1038/labinvest.2011.159](https://doi.org/10.1038/labinvest.2011.159) PMID: [22064320](https://pubmed.ncbi.nlm.nih.gov/22064320/).
  33. Kleiner DE, Brunt EM, Van Natta M, Behling C, Contos MJ, Cummings OW, et al. Design and validation of a histological scoring system for nonalcoholic fatty liver disease. *Hepatology*. 2005; 41(6):1313–21. PMID: [15915461](https://pubmed.ncbi.nlm.nih.gov/15915461/).
  34. Anson M, Crain-Denoyelle AM, Baud V, Chereau F, Gougelet A, Terris B, et al. Oncogenic beta-catenin triggers an inflammatory response that determines the aggressiveness of hepatocellular carcinoma in mice. *The Journal of clinical investigation*. 2012; 122(2):586–99. doi: [10.1172/JCI43937](https://doi.org/10.1172/JCI43937) PMID: [22251704](https://pubmed.ncbi.nlm.nih.gov/22251704/); PubMed Central PMCID: PMC3266772.
  35. Miyagi T, Takehara T, Tatsumi T, Suzuki T, Jinushi M, Kanazawa Y, et al. Concanavalin A injection activates intrahepatic innate immune cells to provoke an antitumor effect in murine liver. *Hepatology*. 2004; 40(5):1190–6. PMID: [15486936](https://pubmed.ncbi.nlm.nih.gov/15486936/).
  36. Libbrecht L, Desmet V, Roskams T. Preneoplastic lesions in human hepatocarcinogenesis. *Liver international: official journal of the International Association for the Study of the Liver*. 2005; 25(1):16–27. PMID: [15698394](https://pubmed.ncbi.nlm.nih.gov/15698394/).
  37. Libbrecht L, Craninx M, Nevens F, Desmet V, Roskams T. Predictive value of liver cell dysplasia for development of hepatocellular carcinoma in patients with non-cirrhotic and cirrhotic chronic viral hepatitis. *Histopathology*. 2001; 39(1):66–73. PMID: [11454046](https://pubmed.ncbi.nlm.nih.gov/11454046/).
  38. Newell P, Villanueva A, Friedman SL, Koike K, Llovet JM. Experimental models of hepatocellular carcinoma. *Journal of hepatology*. 2008; 48(5):858–79. doi: [10.1016/j.jhep.2008.01.008](https://doi.org/10.1016/j.jhep.2008.01.008) PMID: [18314222](https://pubmed.ncbi.nlm.nih.gov/18314222/); PubMed Central PMCID: PMC2990959.
  39. Bakiri L, Wagner EF. Mouse models for liver cancer. *Molecular oncology*. 2013; 7(2):206–23. doi: [10.1016/j.molonc.2013.01.005](https://doi.org/10.1016/j.molonc.2013.01.005) PMID: [23428636](https://pubmed.ncbi.nlm.nih.gov/23428636/).
  40. Berasain C, Castillo J, Perugorria MJ, Latasa MU, Prieto J, Avila MA. Inflammation and liver cancer: new molecular links. *Annals of the New York Academy of Sciences*. 2009; 1155:206–21. PMID: [19250206](https://pubmed.ncbi.nlm.nih.gov/19250206/).
  41. Park EJ, Lee JH, Yu GY, He G, Ali SR, Holzer RG, et al. Dietary and genetic obesity promote liver inflammation and tumorigenesis by enhancing IL-6 and TNF expression. *Cell*. 2010; 140(2):197–208. doi: [10.1016/j.cell.2009.12.052](https://doi.org/10.1016/j.cell.2009.12.052) PMID: [20141834](https://pubmed.ncbi.nlm.nih.gov/20141834/); PubMed Central PMCID: PMC2836922.
  42. Liaskou E, Zimmermann HW, Li KK, Oo YH, Suresh S, Stamataki Z, et al. Monocyte subsets in human liver disease show distinct phenotypic and functional characteristics. *Hepatology*. 2013; 57(1):385–98. PMID: [22911542](https://pubmed.ncbi.nlm.nih.gov/22911542/); PubMed Central PMCID: PMC4194426.
  43. Tilg H. The role of cytokines in non-alcoholic fatty liver disease. *Digestive diseases*. 2010; 28(1):179–85. doi: [10.1159/000282083](https://doi.org/10.1159/000282083) PMID: [20460908](https://pubmed.ncbi.nlm.nih.gov/20460908/).
  44. Tacke F, Luedde T, Trautwein C. Inflammatory pathways in liver homeostasis and liver injury. *Clinical reviews in allergy & immunology*. 2009; 36(1):4–12. doi: [10.1007/s12016-008-8091-0](https://doi.org/10.1007/s12016-008-8091-0) PMID: [18600481](https://pubmed.ncbi.nlm.nih.gov/18600481/).
  45. Grivennikov SI, Karin M. Dangerous liaisons: STAT3 and NF-kappaB collaboration and crosstalk in cancer. *Cytokine & growth factor reviews*. 2010; 21(1):11–9. doi: [10.1016/j.cytogr.2009.11.005](https://doi.org/10.1016/j.cytogr.2009.11.005) PMID: [20018552](https://pubmed.ncbi.nlm.nih.gov/20018552/); PubMed Central PMCID: PMC2834864.



46. Dapito DH, Mencin A, Gwak GY, Pradere JP, Jang MK, Mederacke I, et al. Promotion of hepatocellular carcinoma by the intestinal microbiota and TLR4. *Cancer cell*. 2012; 21(4):504–16. doi: [10.1016/j.ccr.2012.02.007](https://doi.org/10.1016/j.ccr.2012.02.007) PMID: [22516259](https://pubmed.ncbi.nlm.nih.gov/22516259/); PubMed Central PMCID: PMC3332000.
47. Elinav E, Thaiss CA, Flavell RA. Analysis of microbiota alterations in inflammasome-deficient mice. *Methods in molecular biology*. 2013; 1040:185–94. doi: [10.1007/978-1-62703-523-1\\_14](https://doi.org/10.1007/978-1-62703-523-1_14) PMID: [23852605](https://pubmed.ncbi.nlm.nih.gov/23852605/).
48. El-Serag HB, Kramer JR, Chen GJ, Duan Z, Richardson PA, Davila JA. Effectiveness of AFP and ultrasound tests on hepatocellular carcinoma mortality in HCV-infected patients in the USA. *Gut*. 2011; 60(7):992–7. doi: [10.1136/gut.2010.230508](https://doi.org/10.1136/gut.2010.230508) PMID: [21257990](https://pubmed.ncbi.nlm.nih.gov/21257990/).
49. Michielsens P, Ho E. Viral hepatitis B and hepatocellular carcinoma. *Acta gastro-enterologica Belgica*. 2011; 74(1):4–8. PMID: [21563647](https://pubmed.ncbi.nlm.nih.gov/21563647/).
50. Karagozian R, Derdak Z, Baffy G. Obesity-associated mechanisms of hepatocarcinogenesis. *Metabolism: clinical and experimental*. 2014; 63(5):607–17. doi: [10.1016/j.metabol.2014.01.011](https://doi.org/10.1016/j.metabol.2014.01.011) PMID: [24629562](https://pubmed.ncbi.nlm.nih.gov/24629562/).
51. Facciorusso A. The influence of diabetes in the pathogenesis and the clinical course of hepatocellular carcinoma: recent findings and new perspectives. *Current diabetes reviews*. 2013; 9(5):382–6. PMID: [23845075](https://pubmed.ncbi.nlm.nih.gov/23845075/).
52. Nakagawa H, Maeda S. Inflammation- and stress-related signaling pathways in hepatocarcinogenesis. *World journal of gastroenterology: WJG*. 2012; 18(31):4071–81. doi: [10.3748/wjg.v18.i31.4071](https://doi.org/10.3748/wjg.v18.i31.4071) PMID: [22919237](https://pubmed.ncbi.nlm.nih.gov/22919237/); PubMed Central PMCID: PMC3422785.
53. Nault JC, Zucman-Rossi J. TERT promoter mutations in primary liver tumors. *Clinics and research in hepatology and gastroenterology*. 2015. doi: [10.1016/j.clinre.2015.07.006](https://doi.org/10.1016/j.clinre.2015.07.006) PMID: [26336998](https://pubmed.ncbi.nlm.nih.gov/26336998/).
54. Reisman D, Glaros S, Thompson EA. The SWI/SNF complex and cancer. *Oncogene*. 2009; 28(14):1653–68. doi: [10.1038/onc.2009.4](https://doi.org/10.1038/onc.2009.4) PMID: [19234488](https://pubmed.ncbi.nlm.nih.gov/19234488/).
55. Shain AH, Pollack JR. The spectrum of SWI/SNF mutations, ubiquitous in human cancers. *PloS one*. 2013; 8(1):e55119. doi: [10.1371/journal.pone.0055119](https://doi.org/10.1371/journal.pone.0055119) PMID: [23355908](https://pubmed.ncbi.nlm.nih.gov/23355908/); PubMed Central PMCID: PMC3552954.
56. Roberts CW, Leroux MM, Fleming MD, Orkin SH. Highly penetrant, rapid tumorigenesis through conditional inversion of the tumor suppressor gene *Snf5*. *Cancer Cell*. 2002; 2(5):415–25. PMID: [12450796](https://pubmed.ncbi.nlm.nih.gov/12450796/).
57. Shimizu M, Tanaka T, Moriwaki H. Obesity and hepatocellular carcinoma: targeting obesity-related inflammation for chemoprevention of liver carcinogenesis. *Seminars in immunopathology*. 2013; 35(2):191–202. doi: [10.1007/s00281-012-0336-6](https://doi.org/10.1007/s00281-012-0336-6) PMID: [22945457](https://pubmed.ncbi.nlm.nih.gov/22945457/).
58. Naugler WE, Sakurai T, Kim S, Maeda S, Kim K, Elsharkawy AM, et al. Gender disparity in liver cancer due to sex differences in MyD88-dependent IL-6 production. *Science*. 2007; 317(5834):121–4. doi: [10.1126/science.1140485](https://doi.org/10.1126/science.1140485) PMID: [17615358](https://pubmed.ncbi.nlm.nih.gov/17615358/).
59. He G, Dhar D, Nakagawa H, Font-Burgada J, Ogata H, Jiang Y, et al. Identification of liver cancer progenitors whose malignant progression depends on autocrine IL-6 signaling. *Cell*. 2013; 155(2):384–96. doi: [10.1016/j.cell.2013.09.031](https://doi.org/10.1016/j.cell.2013.09.031) PMID: [24120137](https://pubmed.ncbi.nlm.nih.gov/24120137/); PubMed Central PMCID: PMC4015514.
60. Liu Y, Fuchs J, Li C, Lin J. IL-6, a risk factor for hepatocellular carcinoma: FLLL32 inhibits IL-6-induced STAT3 phosphorylation in human hepatocellular cancer cells. *Cell cycle*. 2010; 9(17):3423–7. PMID: [20818158](https://pubmed.ncbi.nlm.nih.gov/20818158/).
